# Supplementary material for: Nox4 and Duox1/2 Mediate Redox Activation of Mesenchymal Cell Migration by PDGF
Source: PubMed Central journal article supplement (PMC4844135; doi:10.1371/journal.pone.0154157), 2016-04-25
Supplement: pone.0154157.s005.pdf [file pone.0154157.s005.pdf]

# Raw images for Figs.4A

Fig 4A (1)

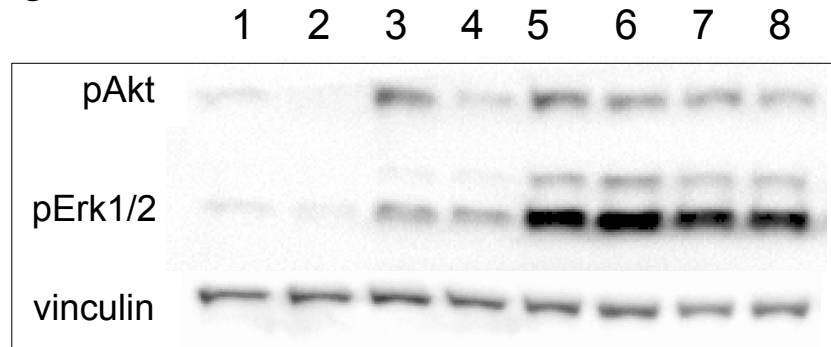

Fig 4A (2)

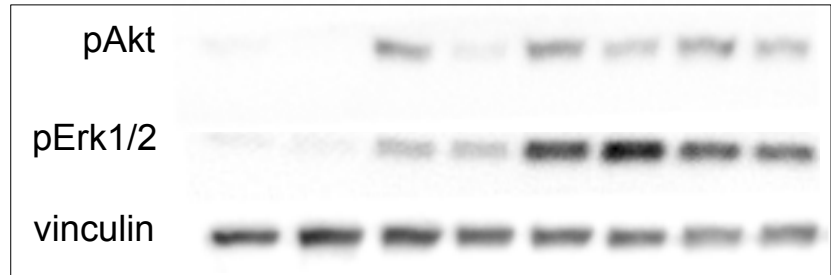

Gel 4A (1)

| Lane # | Description  |
|--------|--------------|
| 1      | No addition  |
| 2      | Apo          |
| 3      | 10' PDGF     |
| 4      | 10' PDGF+Apo |
| 5      | 30' PDGF     |
| 6      | 30' PDGF+Apo |
| 7      | 60' PDGF     |
| 8      | 60' PDGF+Apo |

Gel 4A (2)

| Lane # | Description  |
|--------|--------------|
| 1      | No addition  |
| 2      | Apo          |
| 3      | 10' PDGF     |
| 4      | 10' PDGF+Apo |
| 5      | 30' PDGF     |
| 6      | 30' PDGF+Apo |
| 7      | 60' PDGF     |
| 8      | 60' PDGF+Apo |

# Raw images for Figs.4A (continued) and Fig.4B

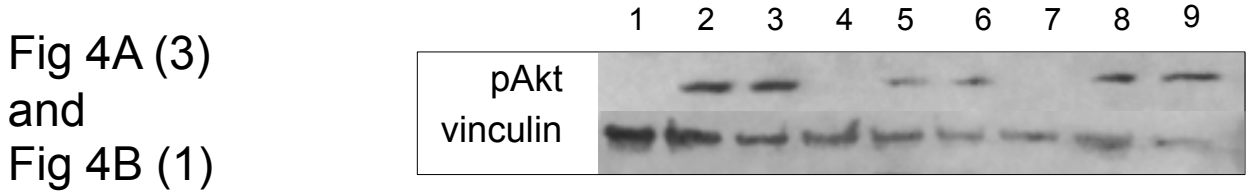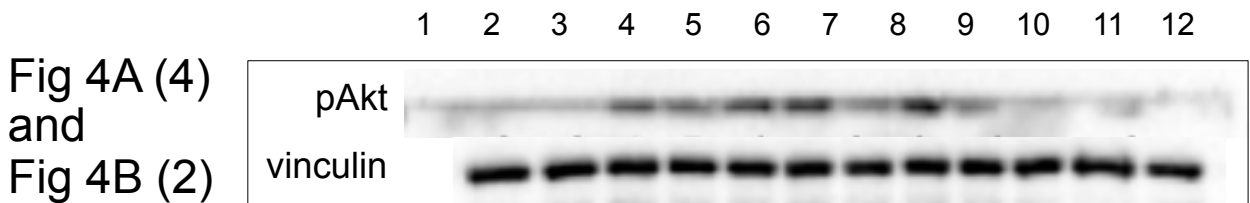

Gel 4A (4) / 4B (1)

| Lane # | Description  |
|--------|--------------|
| 1      | No addition  |
| 2      | 10' PDGF     |
| 3      | 30' PDGF     |
| 4      | Apo          |
| 5      | 10' PDGF+Apo |
| 6      | 30' PDGF+Apo |
| 7      | Cat          |
| 8      | 10' PDGF+Cat |
| 9      | 30' PDGF+Cat |

Gel 4A (5) / 4B (2)

| Lane # | Description  |
|--------|--------------|
| 1      | No addition  |
| 2      | Apo          |
| 3      | Cat          |
| 4      | 10' PDGF     |
| 5      | 10' PDGF+Apo |
| 6      | 10' PDGF+Cat |
| 7      | 30' PDGF     |
| 8      | 30' PDGF+Apo |
| 9      | 30' PDGF+Cat |
| 10     | 60' PDGF     |
| 11     | 60' PDGF+Apo |
| 12     | 60' PDGF+Cat |

## Raw images for Fig.4B (continued)

Fig 4B (3)

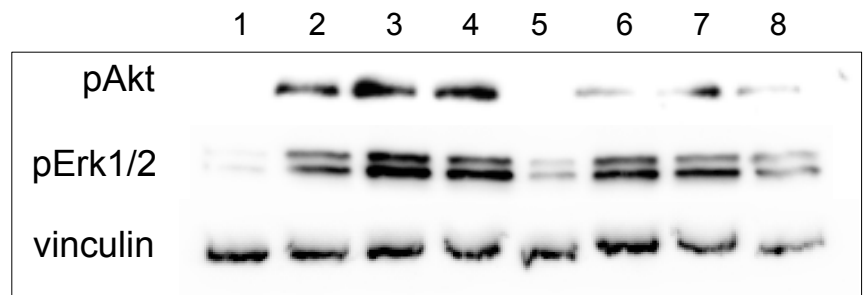

Fig 4B (4)

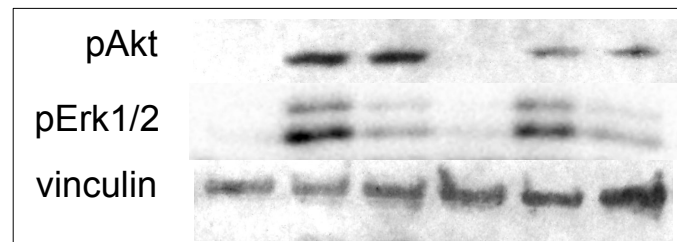

Gel 4B (3)

| Lane # | Description  |
|--------|--------------|
| 1      | No addition  |
| 2      | 10' PDGF     |
| 3      | 30' PDGF     |
| 4      | 60' PDGF     |
| 5      | Cat          |
| 6      | 10' PDGF+Cat |
| 7      | 30' PDGF+Cat |
| 8      | 60' PDGF+Cat |

Gel 4B (4)

| Lane # | Description  |
|--------|--------------|
| 1      | No addition  |
| 2      | 10' PDGF     |
| 3      | 30' PDGF     |
| 4      | Cat          |
| 5      | 10' PDGF+Cat |
| 6      | 30' PDGF+Cat |

## Raw images for Figs.4E

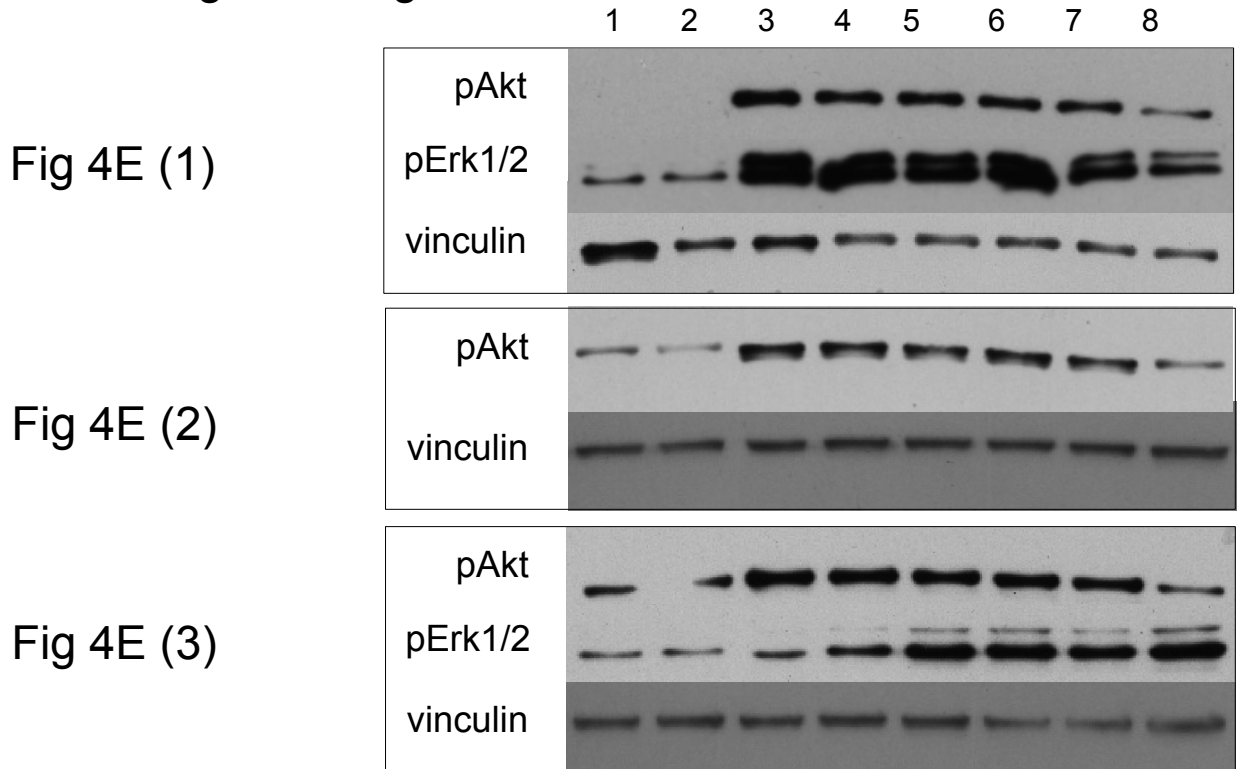

Gel 4E (1)

| Lane # | Description  |
|--------|--------------|
| 1      | No add       |
| 2      | Apo          |
| 3      | 60' PDGF     |
| 4      | 60' PDGF+Apo |
| 5      | 30' PDGF     |
| 6      | 30' PDGF+Apo |
| 7      | 10' PDGF     |
| 8      | 10' PDGF+Apo |

Gel 4E (2)

| Lane # | Description  |
|--------|--------------|
| 1      | No add       |
| 2      | Apo          |
| 3      | 60' PDGF     |
| 4      | 60' PDGF+Apo |
| 5      | 30' PDGF     |
| 6      | 30' PDGF+Apo |
| 7      | 10' PDGF     |
| 8      | 10' PDGF+Apo |

Gel 4E (3)

| Lane # | Description  |
|--------|--------------|
| 1      | No add       |
| 2      | Apo          |
| 3      | 60' PDGF     |
| 4      | 60' PDGF+Apo |
| 5      | 30' PDGF     |
| 6      | 30' PDGF+Apo |
| 7      | 10' PDGF     |
| 8      | 10' PDGF+Apo |

## Raw images for Figs.4E (continued), 4F, and 4J

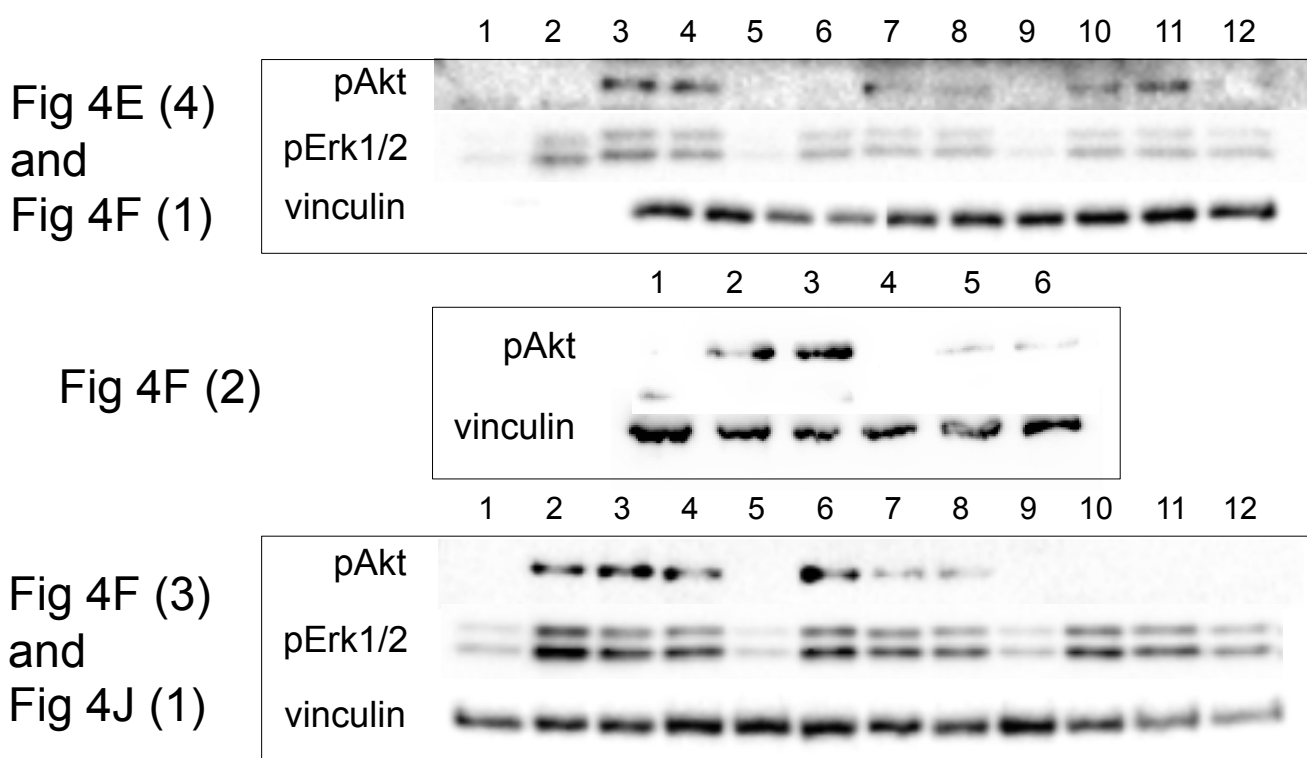

Gel 4E (4) / 4F (1)

| Lane # | Description  |
|--------|--------------|
| 1      | No Add       |
| 2      | 10' PDGF     |
| 3      | 30' PDGF     |
| 4      | 60' PDGF     |
| 5      | Cat          |
| 6      | 10' PDGF+Cat |
| 7      | 30' PDGF+Cat |
| 8      | 60' PDGF+Cat |
| 9      | Apo          |
| 10     | 10' PDGF+Apo |
| 11     | 30' PDGF+Apo |
| 12     | 60' PDGF+Apo |

Gel 4F (2)

| Lane # | Description  |
|--------|--------------|
| 1      | No Add       |
| 2      | 10' PDGF     |
| 3      | 30' PDGF     |
| 4      | Cat          |
| 5      | 10' PDGF+Cat |
| 6      | 30' PDGF+Cat |

Gel 4F (3) / 4J (1)

| Lane # | Description  |
|--------|--------------|
| 1      | No Add       |
| 2      | 10' PDGF     |
| 3      | 30' PDGF     |
| 4      | 60' PDGF     |
| 5      | Cat          |
| 6      | 10' PDGF+Cat |
| 7      | 30' PDGF+Cat |
| 8      | 60' PDGF+Cat |
| 9      | No Add       |
| 10     | 10' EGF      |
| 11     | 30' EGF      |
| 12     | 60' EGF      |

## Raw images for Fig.4I

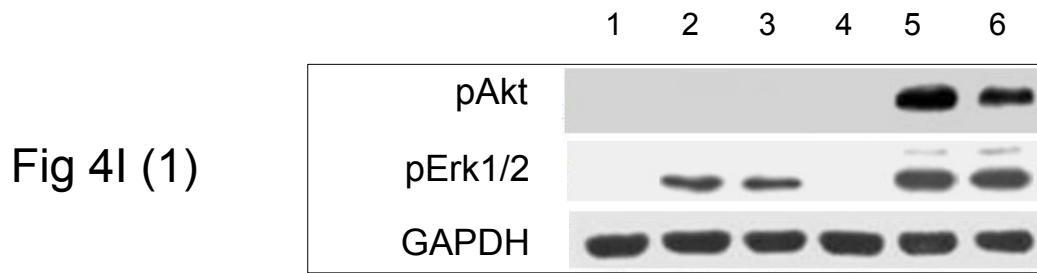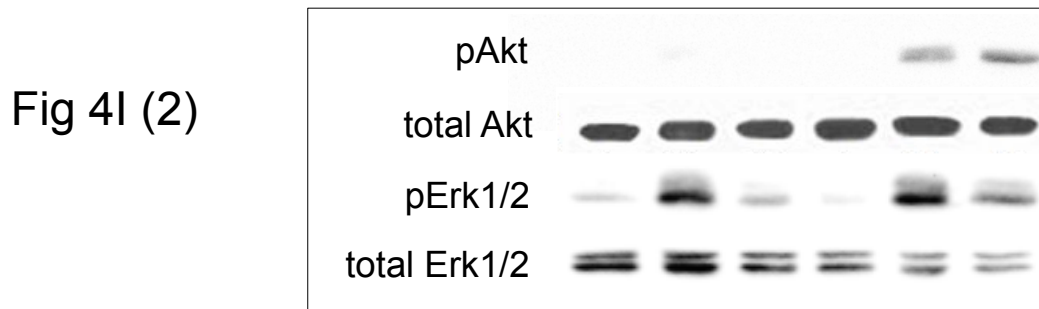

Gel 4I (1)

| Lane # | Description |
|--------|-------------|
| 1      | No Add      |
| 2      | 10' EGF     |
| 3      | 30' EGF     |
| 4      | No Add      |
| 5      | 10' PDGF    |
| 6      | 30' PDGF    |

Gel 4I (2)

| Lane # | Description |
|--------|-------------|
| 1      | No Add      |
| 2      | 10' EGF     |
| 3      | 30' EGF     |
| 4      | No Add      |
| 5      | 10' PDGF    |
| 6      | 30' PDGF    |

## Raw images for Fig.5D

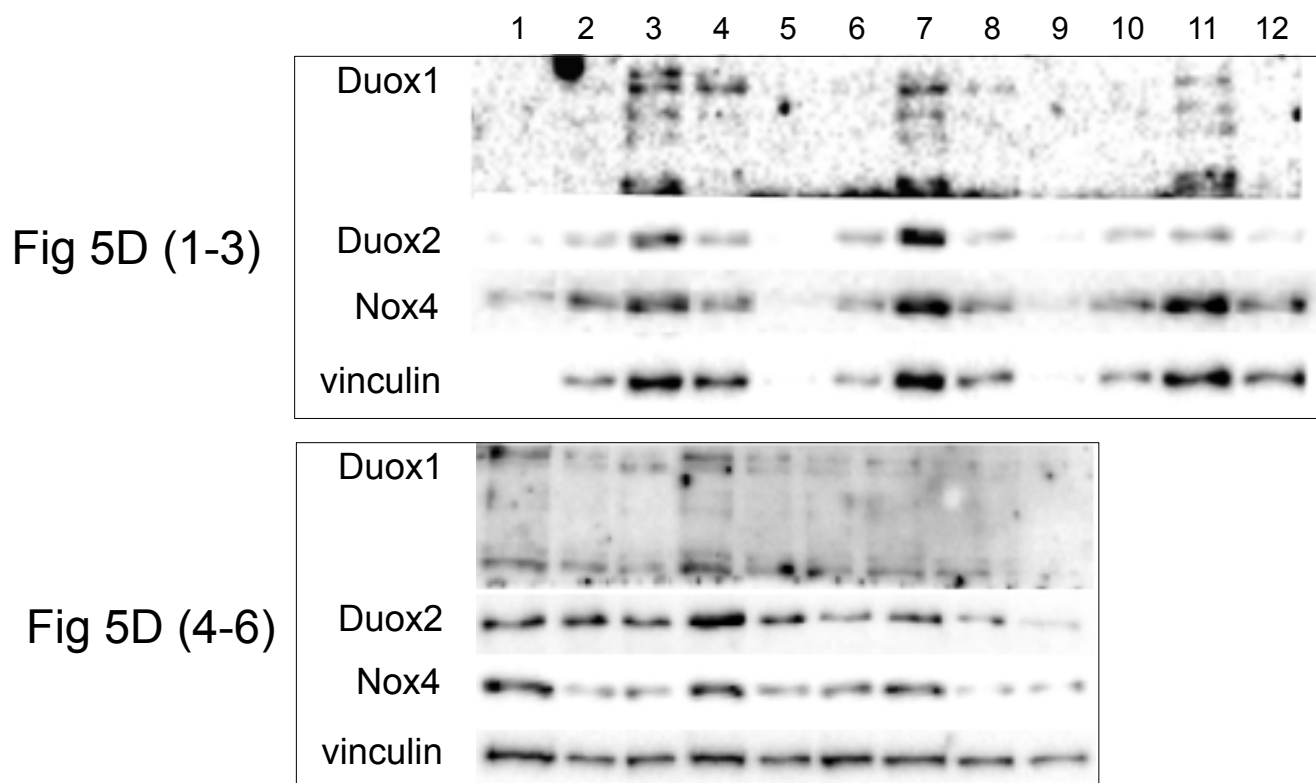

Gel 5D (1-3)

| Lane # | Description   |
|--------|---------------|
| 1      | WT            |
| 2      | Scramble Set1 |
| 3      | shNox4 Set1   |
| 4      | shDuox1 Set1  |
| 5      | WT            |
| 6      | Scramble Set2 |
| 7      | shNox4 Set2   |
| 8      | shDuox1 Set2  |
| 9      | WT            |
| 10     | Scramble Set3 |
| 11     | shNox4 Set3   |
| 12     | shDuox1 Set3  |

Gel 5D (4-6)

| Lane # | Description   |
|--------|---------------|
| 1      | Scramble Set4 |
| 2      | shNox4 Set4   |
| 3      | shDuox1 Set4  |
| 4      | Scramble Set5 |
| 5      | shNox4 Set5   |
| 6      | shDuox1 Set5  |
| 7      | Scramble Set6 |
| 8      | shNox4 Set6   |
| 9      | shDuox1 Set6  |

## Raw images for Fig.5F

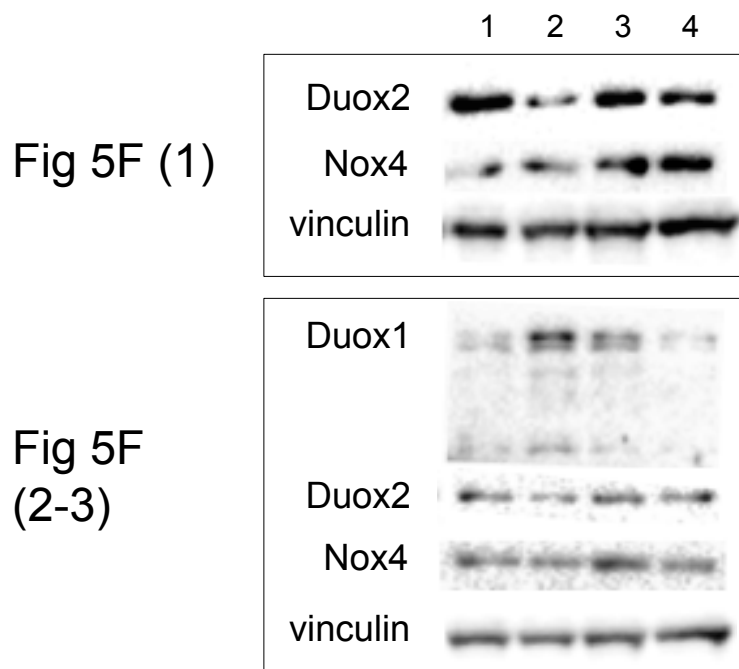

Gel 5F (1)

| Lane # | Description     |
|--------|-----------------|
| 1      | NT Set1         |
| 2      | siDuox2 #1 Set1 |
| 3      | siDuox1 Set1    |
| 4      | siDuox2 #2 Set1 |

Gel 5F (2)

| Lane # | Description     |
|--------|-----------------|
| 1      | NT Set2         |
| 2      | siDuox2 #1 Set2 |
| 3      | siDuox1 Set2    |
| 4      | siDuox2 #2 Set2 |

siDuox1#1 was used in experiments for Fig.6B



## Raw images for Fig.5F (continued)

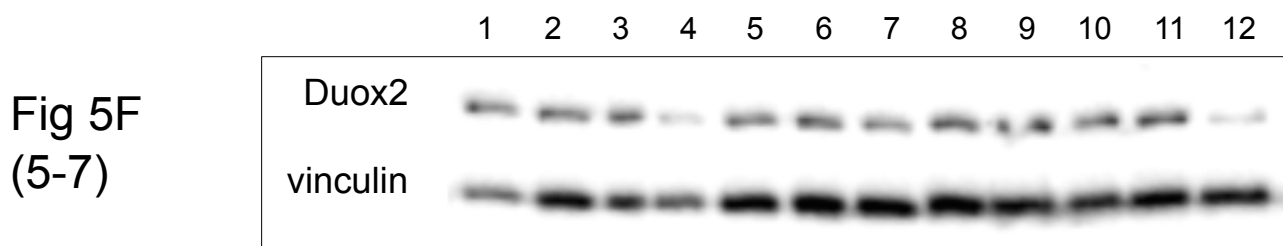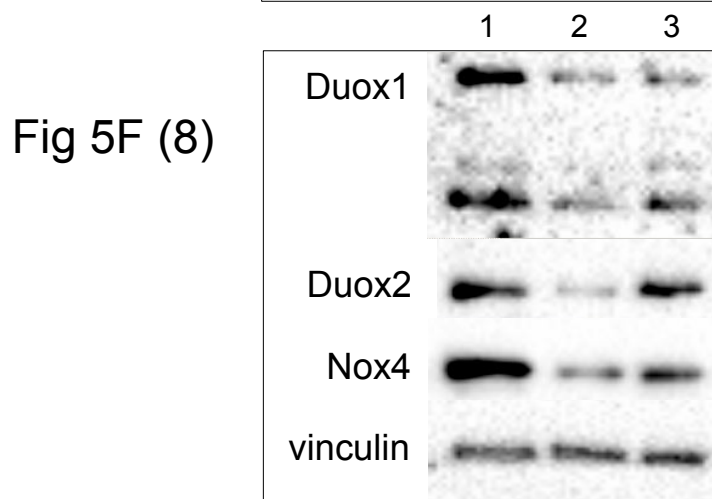

Gel 5F (3-5)

| Lane # | Description     |
|--------|-----------------|
| 1      | NT Set5         |
| 2      | siNox4 Set5     |
| 3      | siDuox1 Set5    |
| 4      | siDuox2 #1 Set5 |
| 5      | NT Set6         |
| 6      | siNox4 Set6     |
| 7      | siDuox1 Set6    |
| 8      | siDuox2#1 Set6  |
| 9      | NT Set7         |
| 10     | siNox4 Set7     |
| 11     | siDuox1 Set7    |
| 12     | siDuox2#1 Set7  |

Gel 5F (6)

| Lane # | Description     |
|--------|-----------------|
| 1      | NT Set8         |
| 2      | siDuox2 #1 Set8 |
| 3      | siDuox1 Set8    |

## Raw images for Fig.5H

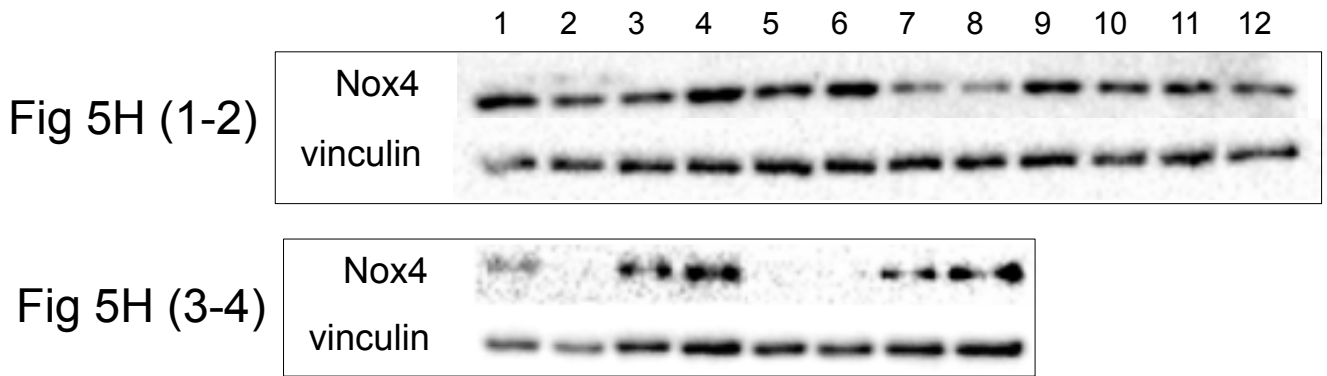

Gel 5H (1-2)

| Lane # | Description    |
|--------|----------------|
| 1      | siNT Set1      |
| 2      | siNox4#1 Set1  |
| 3      | siNox4#2 Set1  |
| 4      | siDuox1#1 Set1 |
| 5      | siDuox1#2 Set1 |
| 6      | siDuox2 Set1   |
| 7      | siNT Set2      |
| 8      | siNox4#1 Set2  |
| 9      | siNox4#2 Set2  |
| 10     | siDuox1#1 Set2 |
| 11     | siDuox1#2 Set2 |
| 12     | siDuox2 Set2   |

Gel 5H (3-4)

| Lane # | Description    |
|--------|----------------|
| 1      | siNT Set1      |
| 2      | siNox4#1 Set1  |
| 3      | siDuox1#1 Set1 |
| 4      | siDuox2 Set1   |
| 5      | siNT Set2      |
| 6      | siNox4#1 Set2  |
| 7      | siDuox1#1 Set2 |
| 8      | siDuox2 Set2   |

siNox4#1 and siDuox1#1 were used in experiments for Fig.6C

## Raw images for Fig.6A

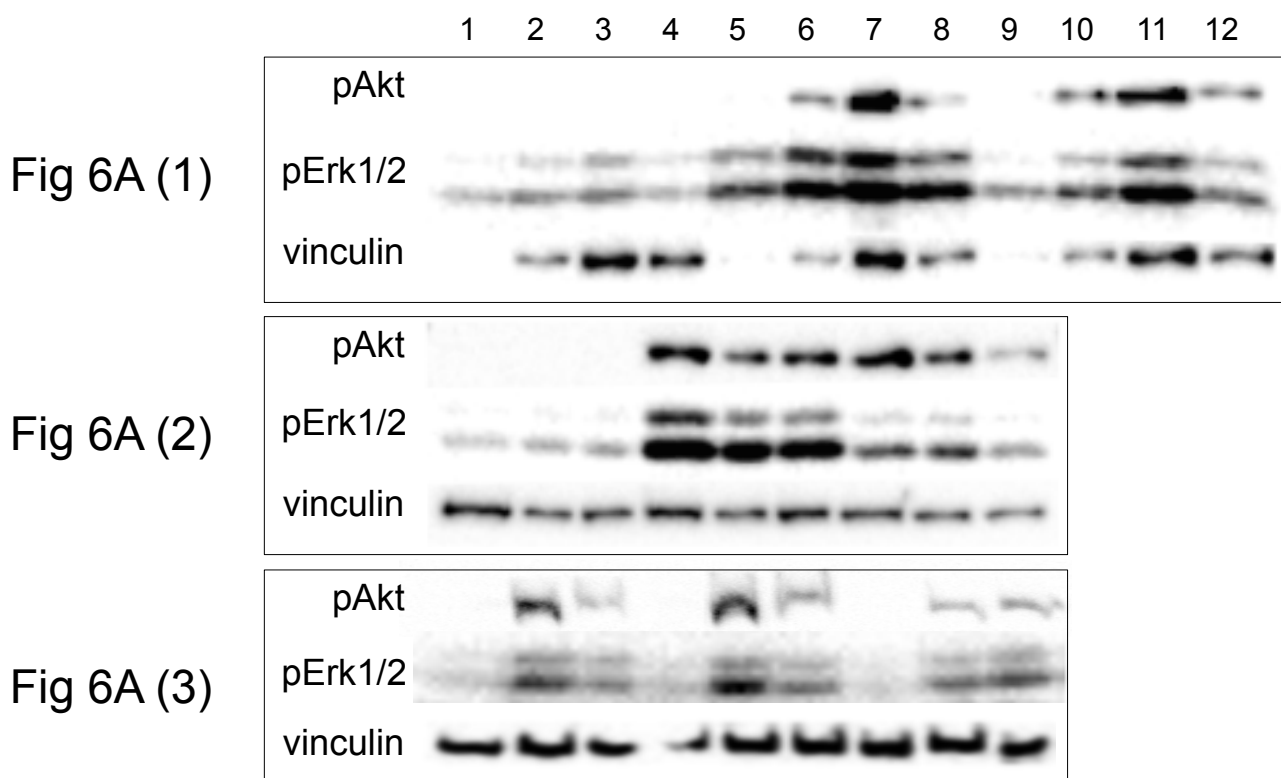

Gel 6A (1)

| Lane # | Description          |
|--------|----------------------|
| 1      | WT No addition       |
| 2      | Scramble No addition |
| 3      | shNox4 No addition   |
| 4      | shDuox1 No addition  |
| 5      | WT 10' PDGF          |
| 6      | Scramble 10' PDGF    |
| 7      | shNox4 10' PDGF      |
| 8      | shDuox1 10' PDGF     |
| 9      | WT 30' PDGF          |
| 10     | Scramble 30' PDGF    |
| 11     | shNox4 30' PDGF      |
| 12     | shDuox1 30' PDGF     |

Gel 6A (2)

| Lane # | Description          |
|--------|----------------------|
| 1      | Scramble No addition |
| 2      | shNox4 No addition   |
| 3      | shDuox1 No addition  |
| 4      | Scramble 10' PDGF    |
| 5      | shNox4 10' PDGF      |
| 6      | shDuox1 10' PDGF     |
| 7      | Scramble 30' PDGF    |
| 8      | shNox4 30' PDGF      |
| 9      | shDuox1 30' PDGF     |

Gel 6A (3)

| Lane # | Description          |
|--------|----------------------|
| 1      | Scramble No addition |
| 2      | Scramble 10' PDGF    |
| 3      | Scramble 30' PDGF    |
| 4      | shNox4 No addition   |
| 5      | shNox4 10' PDGF      |
| 6      | shNox4 30' PDGF      |
| 7      | shDuox1 No addition  |
| 8      | shDuox1 10' PDGF     |
| 9      | shDuox1 30' PDGF     |

## Raw images for Fig.6B

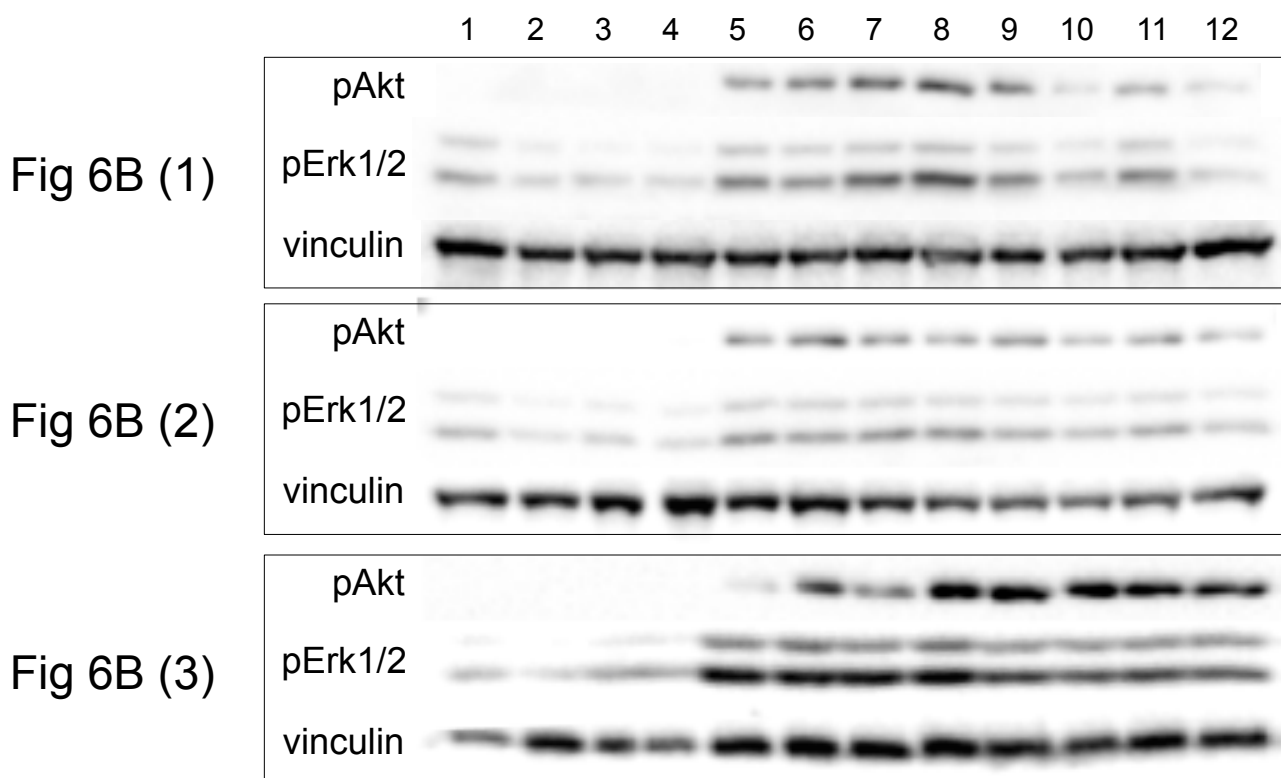

Gel 6B (1)

| Lane # | Description         |
|--------|---------------------|
| 1      | siNT No addition    |
| 2      | siNox4 No addition  |
| 3      | siDuox1#1 No add    |
| 4      | siDuox2 No addition |
| 5      | siNT 10' PDGF       |
| 6      | siNox4 10' PDGF     |
| 7      | siDuox1#1 10' PDGF  |
| 8      | siDuox2 10' PDGF    |
| 9      | siNT 30' PDGF       |
| 10     | siNox4 30' PDGF     |
| 11     | siDuox1#1 30' PDGF  |
| 12     | siDuox2 30' PDGF    |

Gel 6B (2)

| Lane # | Description         |
|--------|---------------------|
| 1      | siNT No addition    |
| 2      | siNox4 No addition  |
| 3      | siDuox1#1 No add    |
| 4      | siDuox2 No addition |
| 5      | siNT 10' PDGF       |
| 6      | siNox4 10' PDGF     |
| 7      | siDuox1#1 10' PDGF  |
| 8      | siDuox2 10' PDGF    |
| 9      | siNT 30' PDGF       |
| 10     | siNox4 30' PDGF     |
| 11     | siDuox1#1 30' PDGF  |
| 12     | siDuox2 30' PDGF    |

Gel 6B (2)

| Lane # | Description         |
|--------|---------------------|
| 1      | siNT No addition    |
| 2      | siNox4 No addition  |
| 3      | siDuox1#1 No add    |
| 4      | siDuox2 No addition |
| 5      | siNT 10' PDGF       |
| 6      | siNox4 10' PDGF     |
| 7      | siDuox1#1 10' PDGF  |
| 8      | siDuox2 10' PDGF    |
| 9      | siNT 30' PDGF       |
| 10     | siNox4 30' PDGF     |
| 11     | siDuox1#1 30' PDGF  |
| 12     | siDuox2 30' PDGF    |

## Raw images for Fig.6C

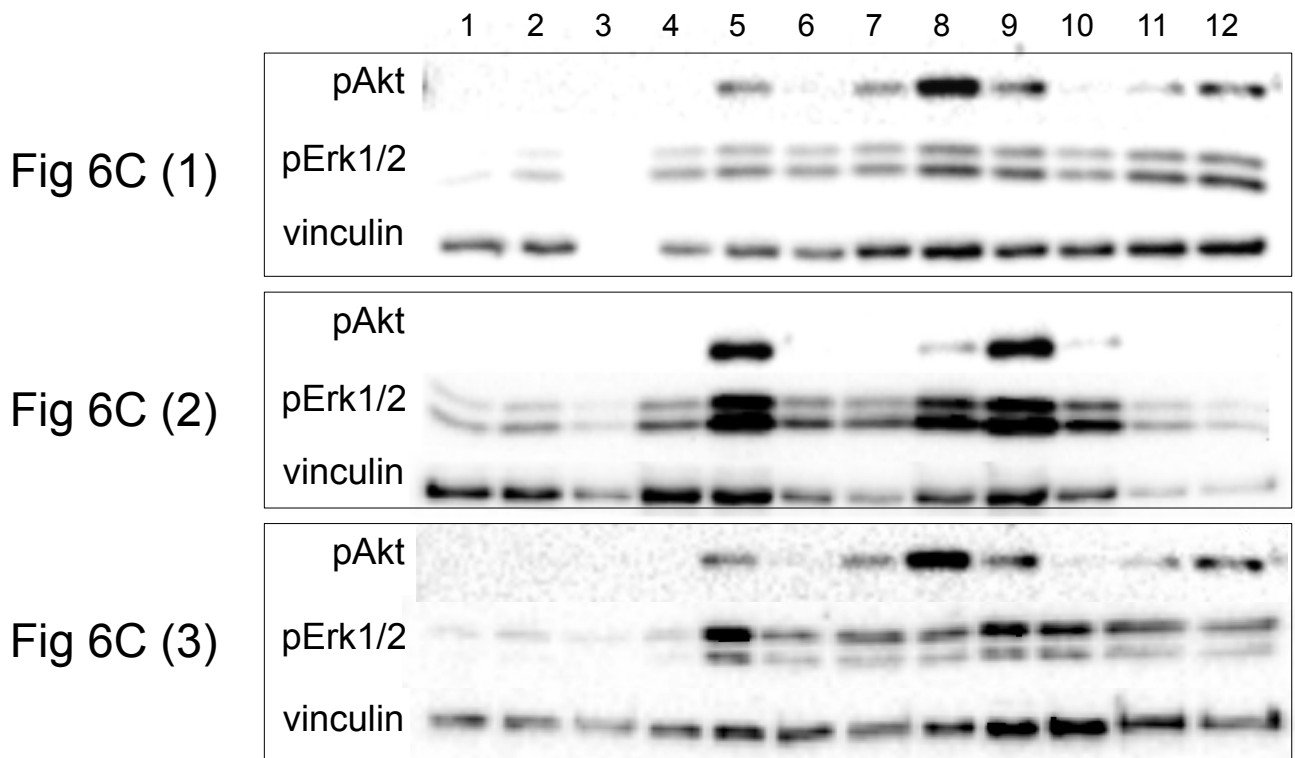

Gel 6C (1)

| Lane # | Description         |
|--------|---------------------|
| 1      | siNT No add         |
| 2      | siNox4#1 No add     |
| 3      | siDuox1#1 No add    |
| 4      | siDuox2 No addition |
| 5      | siNT 30' PDGF       |
| 6      | siNox4#1 30' PDGF   |
| 7      | siDuox1#1 30' PDGF  |
| 8      | siDuox2 30' PDGF    |
| 9      | siNT 60' PDGF       |
| 10     | siNox4#1 60' PDGF   |
| 11     | siDuox1#1 60' PDGF  |
| 12     | siDuox2 60' PDGF    |

Gel 6C (2)

| Lane # | Description         |
|--------|---------------------|
| 1      | siNT No add         |
| 2      | siNox4#1 No add     |
| 3      | siDuox1#1 No add    |
| 4      | siDuox2 No addition |
| 5      | siNT 30' PDGF       |
| 6      | siNox4#1 30' PDGF   |
| 7      | siDuox1#1 30' PDGF  |
| 8      | siDuox2 30' PDGF    |
| 9      | siNT 60' PDGF       |
| 10     | siNox4#1 60' PDGF   |
| 11     | siDuox1#1 60' PDGF  |
| 12     | siDuox2 60' PDGF    |

Gel 6C (2)

| Lane # | Description         |
|--------|---------------------|
| 1      | siNT No add         |
| 2      | siNox4#1 No add     |
| 3      | siDuox1#1 No add    |
| 4      | siDuox2 No addition |
| 5      | siNT 30' PDGF       |
| 6      | siNox4#1 30' PDGF   |
| 7      | siDuox1#1 30' PDGF  |
| 8      | siDuox2 30' PDGF    |
| 9      | siNT 60' PDGF       |
| 10     | siNox4#1 60' PDGF   |
| 11     | siDuox1#1 60' PDGF  |
| 12     | siDuox2 60' PDGF    |
